# Supplementary material for: Multi-Walled Carbon Nanotubes Modified NiCo2S4 for the Efficient Photocatalytic Reduction of Hexavalent Chromium
Source: MDPI journal article supplement (doi:10.3390/c9040099), 2023-10-20
Supplement: s1 [file s1]

## Supporting Information

### **Multi-walled carbon nanotubes modified NiCo<sub>2</sub>S<sub>4</sub> for efficient photocatalytic reduction of hexavalent chromium**

*Qiu Jin<sup>a</sup>, Ziye Zheng<sup>a</sup>, Yuxiao Feng<sup>a</sup>, Tian Shuang<sup>a</sup>, Zuoli He<sup>a,\*</sup>*

*<sup>a</sup>Shandong Key Laboratory of Water Pollution Control and Resource Reuse, School of  
Environmental Science and Engineering, Shandong University, Qingdao 266237, China;*

*\*Corresponding author: Zuoli He;*

Email address: zlhe@sdu.edu.cn(Z. He)

## Materials

PVP (K30), multi-walled carbon nanotubes (MWCNTs), nickel chloride hexahydrate ( $\text{NiCl}_2 \cdot 6\text{H}_2\text{O}$ ), cobalt chloride hexahydrate ( $\text{CoCl}_2 \cdot 6\text{H}_2\text{O}$ ), urea, sodium sulfide nonahydrate ( $\text{Na}_2\text{S} \cdot 9\text{H}_2\text{O}$ ),  $\text{C}_{13}\text{H}_{14}\text{N}_4\text{O}$  (DPC), potassium dichromate ( $\text{K}_2\text{Cr}_2\text{O}_7$ ),  $\text{H}_2\text{SO}_4$  were purchased from Aladdin Inc. (Shanghai, China). The ultrapure water (UPW) used in all experiments was obtained from a Direct-Q system (Millipore, Billerica, MA) with a resistivity of  $18.2 \text{ M}\Omega/\text{cm}$ .

## Characterizations

The crystal structure of the samples was determined via Bruker D8 X-ray diffractometer (XRD) using Cu target radiation source ( $\lambda = 0.154178 \text{ nm}$ ). Transmission electron micrographs (TEM) and high-resolution transmission electron microscopy (HRTEM) images were obtained by using a Talos F200X transmission electron microscope (FEI, USA). X-ray photoelectron spectroscopy (XPS) measurements were conducted by using Thermo Scientific K-Alpha+ with a mono-chromic X-ray source (Al K $\alpha$  line, 1486.6 eV). UV-vis diffuse reflection spectra (UV-vis DRS) were carried by (UV2600). The 300 W Xenon lamp (CEL-HXF300-T3) worked as a UV-vis light source.

## Electrochemical Measurements

Electrochemical analysis was carried out via an electrochemical workstation (660E). The test system employed a standard three-electrode system containing a Pt foil counter electrode, Ag/AgCl reference electrode and a working electrode. The working electrode was prepared as follows: 10 mg samples and 10  $\mu\text{L}$  Nafion aqueous were added to 1 mL ethanol, then sonicated for 30 min to get a slurry mixture. Part of the mixture (40  $\mu\text{L}$ ) was dropped onto the  $1 \times 2 \text{ cm}^2$  FTO glass and dried at room temperature overnight. The

electrolyte was chosen as 0.1 M Na<sub>2</sub>SO<sub>4</sub> aqueous solution and transient photocurrent, EIS responses were conducted under intermittent simulated solar light, and the light source was a 300 W Xe lamp (CEL-HXF300-T3). Mott-Schottky plots of the photocatalysts were collected at 1000 Hz with a potential range of -1 V to 1 V.

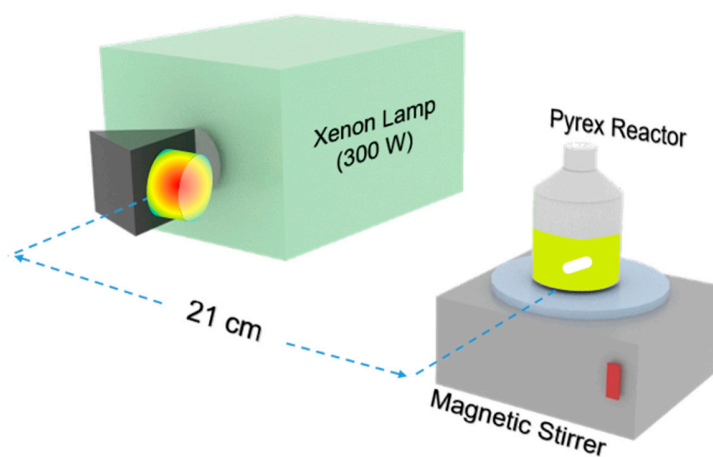

**Figure S1.** The schematic diagram of the reactor.

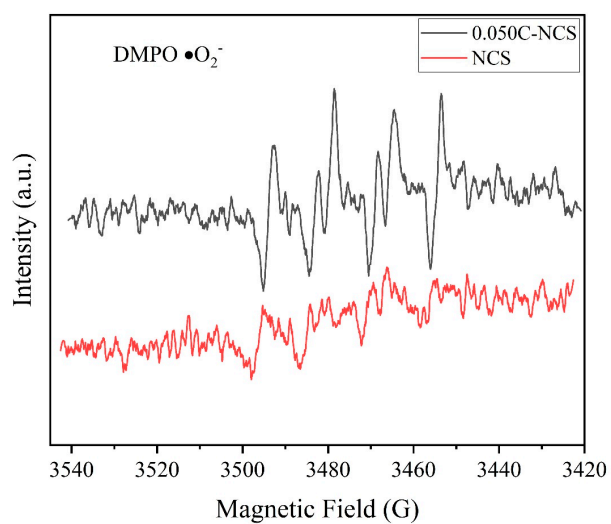

**Figure S2.** ESR spectrum of the  $\bullet\text{O}_2^-$  produced by  $\text{NiCo}_2\text{S}_4$  and 0.050 CNT- $\text{NiCo}_2\text{S}_4$  under visible-light irradiation.

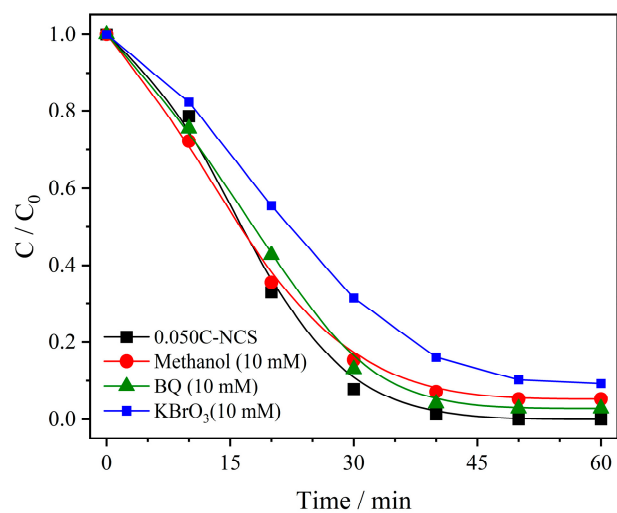

**Figure S3.** Effect of scavengers on photocatalytic degradation of Cr(VI) during the trapping experiments of the 0.050 CNT-NiCo<sub>2</sub>S<sub>4</sub>.

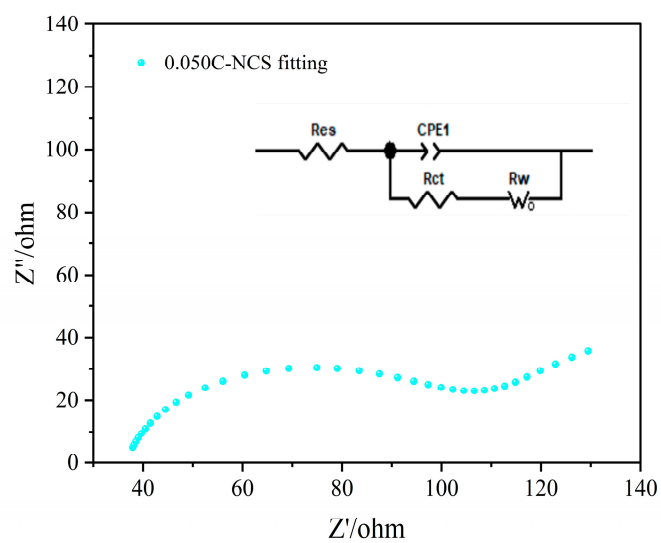

**Figure S4.** Circuit fitted Nyquist plot of the 0.050C-NCS with a suitable modified Randle circuit (inset).

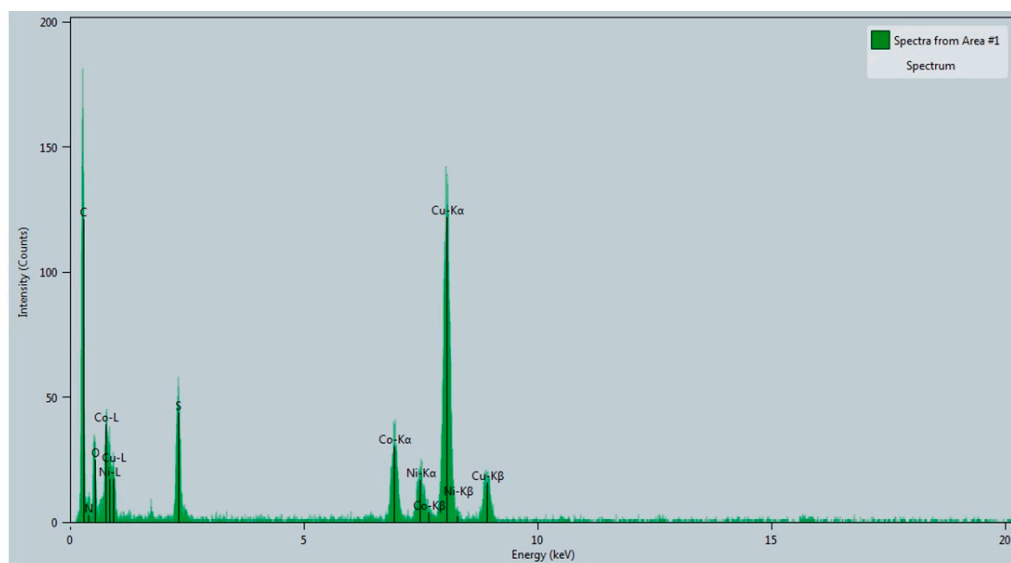

**Figure S5.** Energy dispersive spectroscopy of 0.050 CNT-NiCo<sub>2</sub>S<sub>4</sub>.

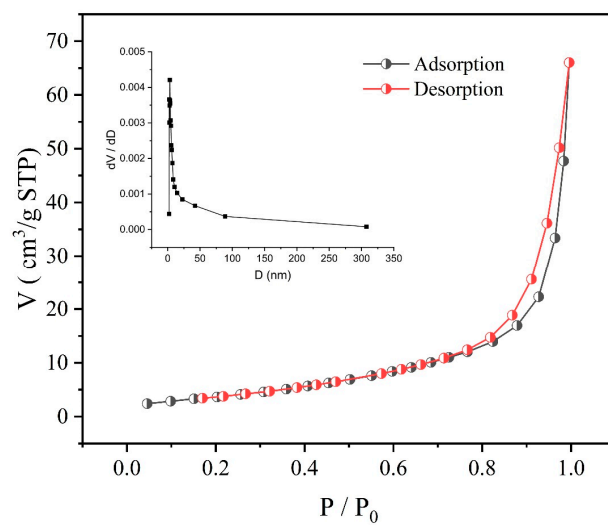

**Figure S6.** N<sub>2</sub> adsorption and desorption isotherms and corresponding pore-size distribution curves (inset) for 0.005 CNT-NiCo<sub>2</sub>S<sub>4</sub>.

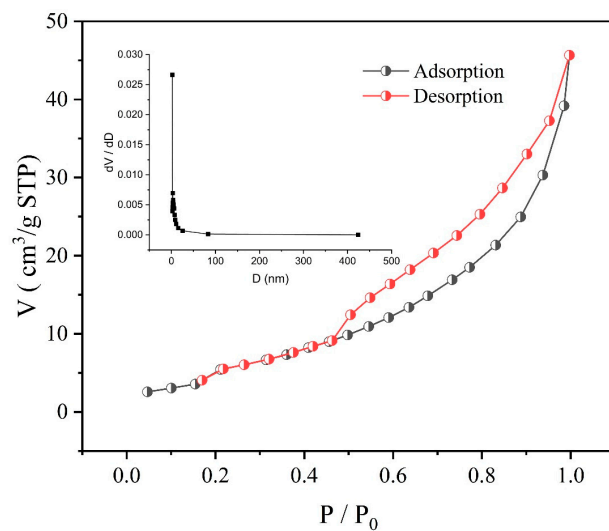

**Figure S7.**  $N_2$  adsorption and desorption isotherms and corresponding pore-size distribution curves (inset) for 0.035 CNT-NiCo<sub>2</sub>S<sub>4</sub>.

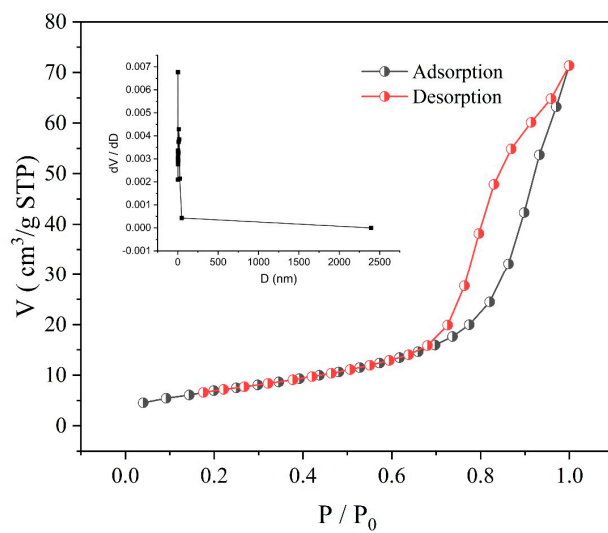

**Figure S8.**  $N_2$  adsorption and desorption isotherms and corresponding pore-size distribution curves (inset) for 0.075 CNT-NiCo<sub>2</sub>S<sub>4</sub>.

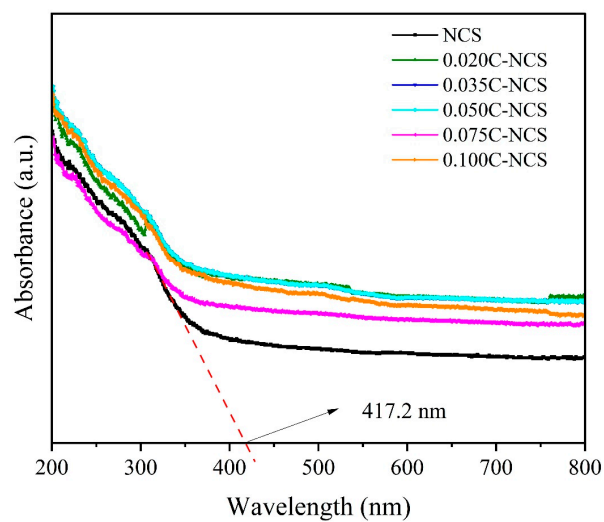

**Figure S9.** UV-vis Diffuse Reflectance Absorption Spectra (DRS) of as-prepared samples with different amounts of CNT



**Table S1.** Comparison of photocatalytic efficiency for photocatalytic reduction of Cr(VI) between previously reported literature and the present work.

| <b>Material</b>                                                  | <b>C<sub>catalyst</sub><br/>(g/L)</b> | <b>C<sub>Cr(VI)</sub><br/>(mg/L)</b> | <b>Reaction Time<br/>Adsorption<br/>catalytic (min)</b> | <b>+ Removal<br/>(%)</b> | <b>Refs.</b> |
|------------------------------------------------------------------|---------------------------------------|--------------------------------------|---------------------------------------------------------|--------------------------|--------------|
| OH-TiO <sub>2</sub>                                              | 1                                     | 10                                   | 30 min + 30 min                                         | 88                       | [1]          |
| TiO <sub>2</sub> /Nd                                             | 1                                     | 10                                   | 30 min + 180 min                                        | 99                       | [2]          |
| Gd(OH) <sub>3</sub> /RGO                                         | 1                                     | 10                                   | 30 min + 120 min                                        | 83                       | [3]          |
| RGO/ $\alpha$ FeOOH                                              | 1                                     | 10                                   | 30 min + 180 min                                        | 94                       | [4]          |
| SrTiO <sub>3</sub>                                               | 1                                     | 20                                   | 60 min + 240 min                                        | 99                       | [5]          |
| ZnWO <sub>4</sub>                                                | 1                                     | 40                                   | 60 min + 45 min                                         | 32                       | [6]          |
| ZrO <sub>2</sub> -CuO                                            | 1                                     | 40                                   | 10 min + 20 min                                         | 80                       | [7]          |
| rGO@TiO <sub>2</sub>                                             | 0.67                                  | 10                                   | 30 min + 180 min                                        | 98                       | [8]          |
| BiVO <sub>4</sub> /Bi <sub>2</sub> S <sub>3</sub>                | 0.5                                   | 10                                   | 10 min + 60 min                                         | 91.2                     | [9]          |
| Bi <sub>2</sub> S <sub>3</sub>                                   | 0.5                                   | 40                                   | 30 min + 120 min                                        | 90                       | [10]         |
| SnO <sub>2</sub> @Bi <sub>2</sub> WO <sub>6</sub>                | 0.3                                   | 10                                   | 15 min + 50 min                                         | 98.2                     | [11]         |
| MoS <sub>2</sub> -Bi <sub>2</sub> S <sub>3</sub>                 | 0.25                                  | 5                                    | 60 min + 30 min                                         | 98                       | [12]         |
| CPVA/MoS <sub>2</sub> -OH                                        | 0.2                                   | 100                                  | 60 min + 105 min                                        | 96                       | [13]         |
| Bi <sub>2</sub> MoO <sub>6</sub> /Bi <sub>2</sub> S <sub>3</sub> | 0.4                                   | 20                                   | 80 min + 16 min                                         | 100                      | [14]         |
| BiOCl/Bi <sub>2</sub> S <sub>3</sub>                             | 1                                     | 50                                   | 40 min + 9 min                                          | 100                      | [15]         |
| SnS <sub>2</sub> -In <sub>2</sub> S <sub>3</sub>                 | 0.2                                   | 40                                   | 30 min + 30 min                                         | 100                      | [16]         |
| 0.050C-NCS                                                       | 0.5                                   | 50                                   | 30 min + 40 min                                         | 100                      | Here         |

- [1] Y. Li, Y. Bian, H. Qin, Y. Zhang, Z. Bian, Photocatalytic reduction behavior of hexavalent chromium on hydroxyl modified titanium dioxide, *Appl. Catal. B*, 206 (2017) 293-299.
- [2] S. Rengaraj, S. Venkataraj, J.-W. Yeon, Y. Kim, X.Z. Li, G.K.H. Pang, Preparation, characterization and application of Nd-TiO<sub>2</sub> photocatalyst for the reduction of Cr(VI) under UV light illumination, *Appl. Catal. B*, 77 (2007) 157-165.
- [3] D.K. Padhi, G.K. Pradhan, K.M. Parida, S.K. Singh, Facile fabrication of GdOH<sub>3</sub> nanorod/RGO composite: Synthesis, characterisation and photocatalytic reduction of Cr(VI), *Chem. Eng. J.*, 255 (2014) 78-88.
- [4] D.K. Padhi, K. Parida, Facile fabrication of alpha-FeOOH nanorod/RGO composite: A robust photocatalyst for reduction of Cr(VI) under visible light irradiation, *J. Mater. Chem. A*, 2 (2014) 10300-10312.
- [5] D. Yang, Y. Sun, Z. Tong, Y. Nan, Z. Jiang, Fabrication of bimodal-pore SrTiO<sub>3</sub> microspheres with excellent photocatalytic performance for Cr(VI) reduction under simulated sunlight, *J. Hazard. Mater.*, 312 (2016) 45-54.
- [6] H. He, Z. Luo, Z.-Y. Tang, C. Yu, Controllable construction of ZnWO<sub>4</sub> nanostructure with enhanced performance for photosensitized Cr(VI) reduction, *Appl. Surf. Sci.*, 490 (2019) 460-468.
- [7] B. Nanda, A.C. Pradhan, K.M. Parida, Fabrication of mesoporous CuO/ZrO<sub>2</sub>-MCM-41 nanocomposites for photocatalytic reduction of Cr(VI), *Chem. Eng. J.*, 316 (2017) 1122-1135.
- [8] L. Liu, C. Luo, J. Xiong, Z. Yang, Y. Zhang, Y. Cai, H. Gu, Reduced graphene oxide (rGO) decorated TiO<sub>2</sub> microspheres for visible-light photocatalytic reduction of Cr(VI), *J Alloy Compd*, 690 (2017) 771-776.
- [9] X. Gao, H.B. Wu, L. Zheng, Y. Zhong, Y. Hu, X.W. Lou, Formation of mesoporous heterostructured BiVO<sub>4</sub>/Bi<sub>2</sub>S<sub>3</sub> hollow discoids with enhanced photoactivity, *Angew. Chem. Int. Ed.*, 53 (2014) 5917-5921.
- [10] S. Luo, F. Qin, Y.a. Ming, H. Zhao, Y. Liu, R. Chen, Fabrication uniform hollow Bi<sub>2</sub>S<sub>3</sub> nanospheres via Kirkendall effect for photocatalytic reduction of Cr(VI) in electroplating industry wastewater, *J. Hazard. Mater.*, 340 (2017) 253-262.
- [11] N. Song, M. Zhang, H. Zhou, C. Li, G. Liu, S. Zhong, S. Zhang, Synthesis and properties of Bi<sub>2</sub>WO<sub>6</sub> coupled with SnO<sub>2</sub> nano-microspheres for improved photocatalytic reduction of Cr<sup>6+</sup> under visible light irradiation, *Appl. Surf. Sci.*, 495 (2019) 143551.
- [12] B. Weng, X. Zhang, N. Zhang, Z.-R. Tang, Y.-J. Xu, Two-dimensional MoS<sub>2</sub> nanosheet-coated Bi<sub>2</sub>S<sub>3</sub> discoids: Synthesis, formation mechanism, and photocatalytic application, *Langmuir*, 31 (2015) 4314-4322.
- [13] K. Wang, P. Chen, W. Nie, Y. Xu, Y. Zhou, Improved photocatalytic reduction of Cr(VI) by molybdenum disulfide modified with conjugated polyvinyl alcohol, *Chem. Eng. J.*, 359 (2019) 1205-1214.
- [14] X.-Q. Qiao, Z.-W. Zhang, Q.-H. Li, D. Hou, Q. Zhang, J. Zhang, D.-S. Li, P. Feng, X. Bu, In situ synthesis of n-n Bi<sub>2</sub>MoO<sub>6</sub> & Bi<sub>2</sub>S<sub>3</sub> heterojunctions for highly efficient photocatalytic removal of Cr(VI), *J. Mater. Chem. A*, 6 (2018) 22580-22589.
- [15] Y. Lu, J. Song, W. Li, Y. Pan, H. Fang, X. Wang, G. Hu, Preparation of BiOCl/Bi<sub>2</sub>S<sub>3</sub> composites by simple ion exchange method for highly efficient photocatalytic reduction of Cr<sup>6+</sup>, *Appl. Surf. Sci.*, 506 (2020) 145000.
- [16] L. Wang, S.K. Karuturi, L. Zan, SnS<sub>2</sub>-In<sub>2</sub>S<sub>3</sub> p-n heterostructures with enhanced Cr<sup>6+</sup> reduction under visible-light irradiation, *Appl. Surf. Sci.*, 537 (2021) 148063.
